# Supplementary material
Source: PubMed Central journal article supplement (PMC8058008)
Supplement: si_gzab004.pdf [file si_gzab004.pdf]

| Type             | Name                            | Sequence                                                                                                                                                                                                                            |
|------------------|---------------------------------|-------------------------------------------------------------------------------------------------------------------------------------------------------------------------------------------------------------------------------------|
| Repeat Sequences | PAS <sub>38</sub>               | PAAPAPASPAAPAPSAPAASPAAPAPASPAAPAPSAPA                                                                                                                                                                                              |
|                  | PAS <sub>18</sub>               | PAAPAPASPAAPAPSAPA                                                                                                                                                                                                                  |
|                  | (G <sub>4</sub> S) <sub>3</sub> | GGGGSGGGGSGGGGS                                                                                                                                                                                                                     |
| Linkers          | pCT-80                          | [Aga2p] - KDNSSTIEGRYPYDVPDYALQAS - PAS <sub>40</sub> - (G <sub>4</sub> S) <sub>3</sub> - AS                                                                                                                                        |
|                  | pCT-961                         | [Aga2p] - KDNSSTIEGRYPYDVPDYALQAS - PAS <sub>40</sub> - (G <sub>4</sub> S) <sub>3</sub> - APR - [PAS <sub>18</sub> - (G <sub>4</sub> S) <sub>3</sub> - AR] <sub>15</sub> - PAS <sub>18</sub> - (G <sub>4</sub> S) <sub>3</sub> - AS |

**SI Table 1.** Repetitive amino acid sequences and linker sequences used in pCT-80 and pCT-641.

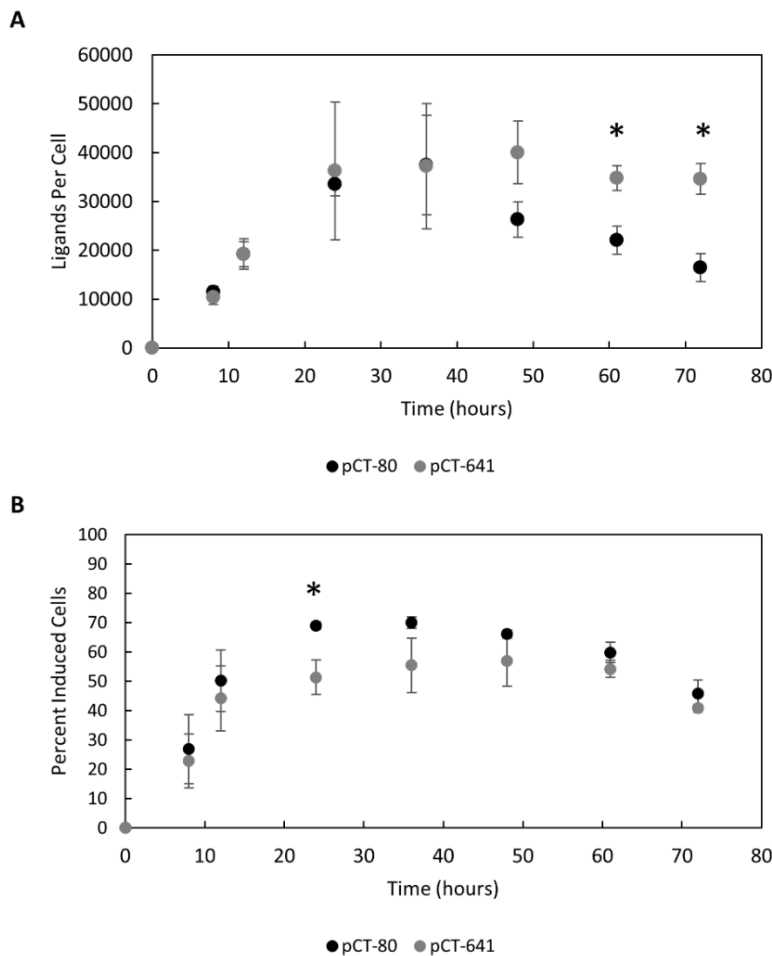

**SI Figure 1.** Yeast containing pCT-80 or pCT-641 expression plasmids encoding for E6.2.6' were grown at 30°C and induced at 20°C. Aliquots were taken from each sample at specified timepoints and labelled with an anti-c-myc antibody and anti-mouse-FITC secondary antibody. Their fluorescence was analyzed by flow cytometry and compared to a quantitative bead standard labelled with the same antibody mixture to determine ligand expression. Ligand expression (A) and percent induction (B) are presented as the mean of three samples ± standard deviation. \* indicates  $p < 0.05$  difference between pCT-80 and pCT-641.
